# Supplementary material
Source: PubMed Central journal article supplement (PMC3582352)
Supplement: NIHMS412716-supplement-supplement_1.pdf [file NIHMS412716-supplement-supplement_1.pdf]

## SUPPLEMENTAL FIGURE 1

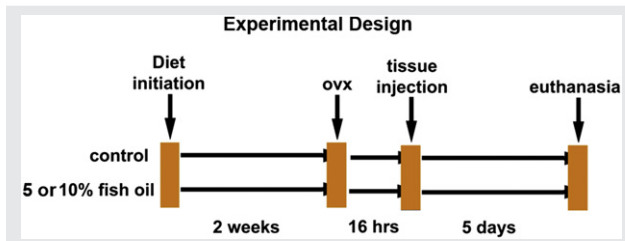

Timeline of the experimental design. After 1 week of acclimatization to the Vanderbilt vivarium, mice were randomized to receive control diet, 10% fish oil diet, or 5% fish oil diet. Two weeks after randomization, mice were subjected to ovariectomy followed by initiation of experimental endometriosis 16 hours later. All of the mice were killed 5 days later.

*Herington. Fish oil inhibition of adhesions. Fertil Steril 2013.*
